# Supplementary material
Source: publisher figshare collection journal article supplement (https://frontiersin.figshare.com/ndownloader/files/21937062)
Supplement: Supplementary file [file 21937062]

**Supplementary Data:** Parameters used for each iteration in scaffolding with LINKS v1.8.5 (Warren et al., 2015).

| Iteration | d      | t  | k  | l | a   |
|-----------|--------|----|----|---|-----|
| 1         | 1,000  | 50 | 19 | 5 | 0.3 |
| 2         | 2,500  | 25 | 19 | 5 | 0.3 |
| 3         | 5,000  | 10 | 19 | 5 | 0.3 |
| 4         | 7,500  | 5  | 19 | 5 | 0.3 |
| 5         | 10,000 | 5  | 19 | 5 | 0.3 |
| 6         | 15,000 | 5  | 19 | 5 | 0.3 |
| 7         | 20,000 | 2  | 19 | 5 | 0.3 |
| 8         | 25,000 | 2  | 19 | 5 | 0.3 |
| 9         | 30,000 | 2  | 19 | 5 | 0.3 |
| 10        | 35,000 | 2  | 19 | 5 | 0.3 |
| 11        | 40,000 | 2  | 19 | 5 | 0.3 |
| 12        | 45,000 | 2  | 19 | 5 | 0.3 |
| 13        | 50,000 | 2  | 19 | 5 | 0.3 |
| 14        | 55,000 | 2  | 19 | 5 | 0.3 |
| 15        | 60,000 | 2  | 19 | 5 | 0.3 |
| 16        | 65,000 | 2  | 19 | 5 | 0.3 |
| 17        | 70,000 | 2  | 19 | 5 | 0.3 |
| 18        | 75,000 | 2  | 19 | 5 | 0.3 |
| 19        | 80,000 | 2  | 19 | 5 | 0.3 |
| 20        | 85,000 | 2  | 19 | 5 | 0.3 |

*d* : distance between *k*-mer pairs (ie. target distances to re-scaffold on)  
*t* : step of sliding window when extracting *k*-mer pairs from long reads  
*k* : *k*-mer value  
*l* : minimum number of links (*k*-mer pairs) to compute scaffold (default -l 5)  
*a* : maximum link ratio between two best contig pairs (default -a 0.3)

## References

Warren, R.L., Yang, C., Vandervalk, B.P., Behsaz, B., Lagman, A., Jones, S.J.M., et al. (2015).  
 LINKS: Scalable, alignment-free scaffolding of draft genomes with long reads.  
*GigaScience* 4(1), 35. doi: 10.1186/s13742-015-0076-3.
